# Supplementary material for: Pachypodol, a Methoxyflavonoid Isolated from Pogostemon cablin Bentham Exerts Antioxidant and Cytoprotective Effects in HepG2 Cells: Possible Role of ERK-Dependent Nrf2 Activation
Source: MDPI journal article supplement (doi:10.3390/ijms20174082), 2019-08-21
Supplement: s1 [file s1]

## Supplementary Materials

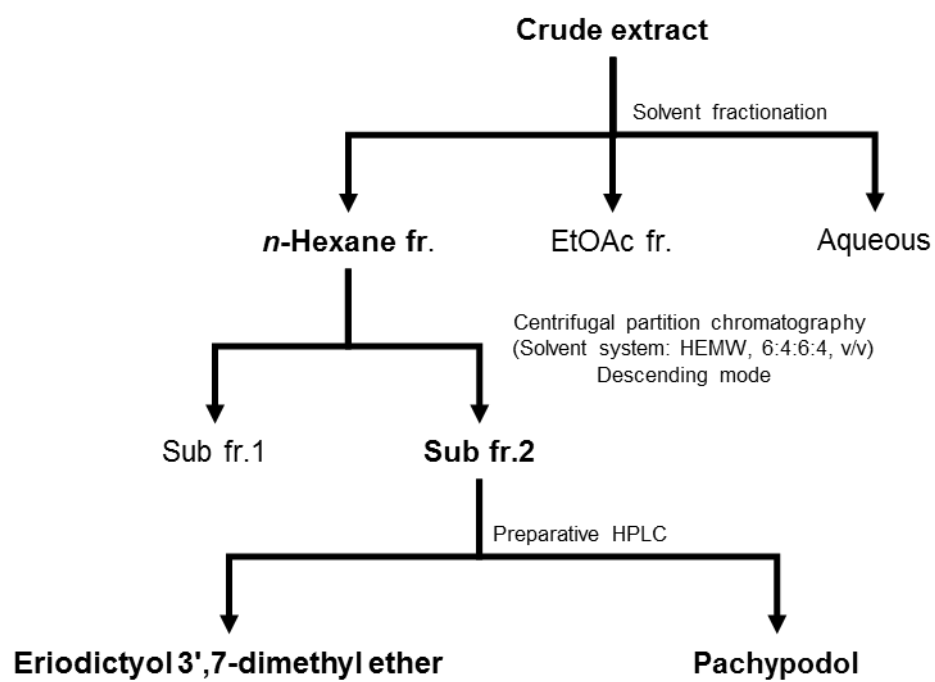

**Figure S1.** Activity-guided isolation scheme for pachypodol and eriodictyol 3',7-dimethyl ether from *P. cablin*.

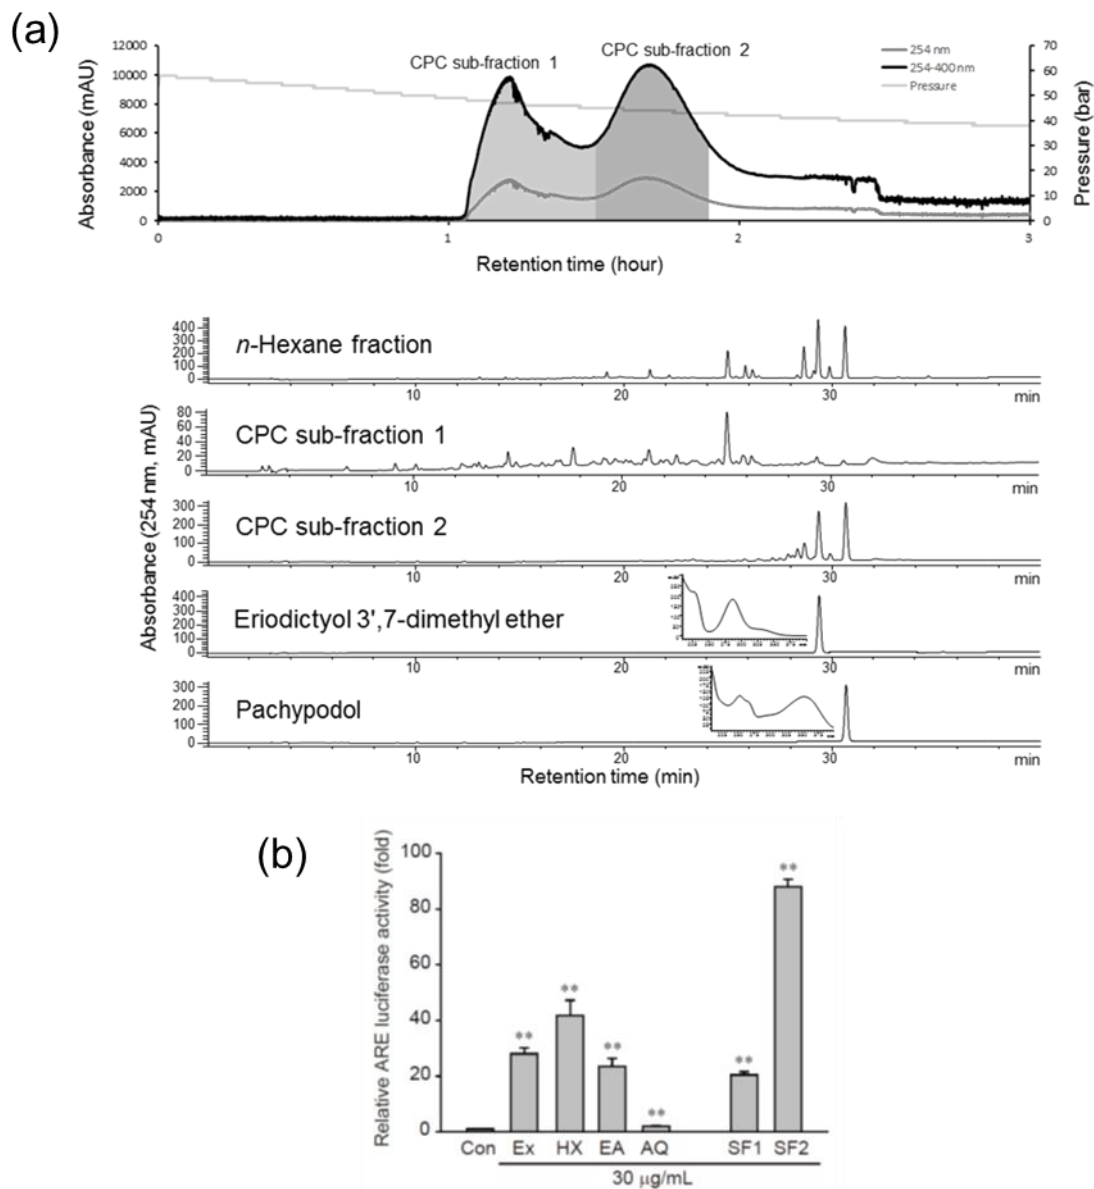

**Figure S2.** HPLC chromatograms and ARE-luciferase activities of crude extract and sub-fractions from *P. cablin*. (a) CPC chromatogram of the *n*-hexane fraction from *P. cablin* and HPLC chromatograms of CPC sub-fractions and isolated compounds. CPC operation conditions: two-phase solvent system, *n*-hexane–ethyl acetate–methanol–water with a volume ratio 6:4:6:4; descending mode, mobile phase-lower aqueous phase; flow-rate, 10 mL/min; rotation speed, 1200 rpm; monitored at 254 nm and scan mode (254–400 nm). HPLC conditions: Column, INNO Column C18 (4.6 × 250 mm, 5 µm, YoungJin Biochrom, Korea); mobile phase, acetonitrile (1% formic acid, solvent A)–water (1% formic acid, solvent B) in a gradient mode: 0–50 min, 10–100 % A; 60 min, 100 % A. The flow rate was 1 mL/min, whereas the injection volume was 10 µL. The diode array detector (DAD) measured UV spectrum over a range of 210 to 600 nm and the chromatogram of the effluents was recorded at 254 nm. (b) ARE-luciferase activities in the lysates of pGL4.37 plasmid stably transfected HepG2 cells treated with crude extract, each solvent fraction, or CPC sub-fractions for 12 h. Data represent the mean ± S.D. (n = 3). \*\**P* < 0.01 (compared with the DMSO-treated vehicle control). AQ, aqueous; ARE, antioxidant response element; CPC, centrifugal partition chromatography; EA, ethyl acetate; Ex, crude extract; HX, *n*-hexane; SF1/2, CPC sub-fraction 1/2.

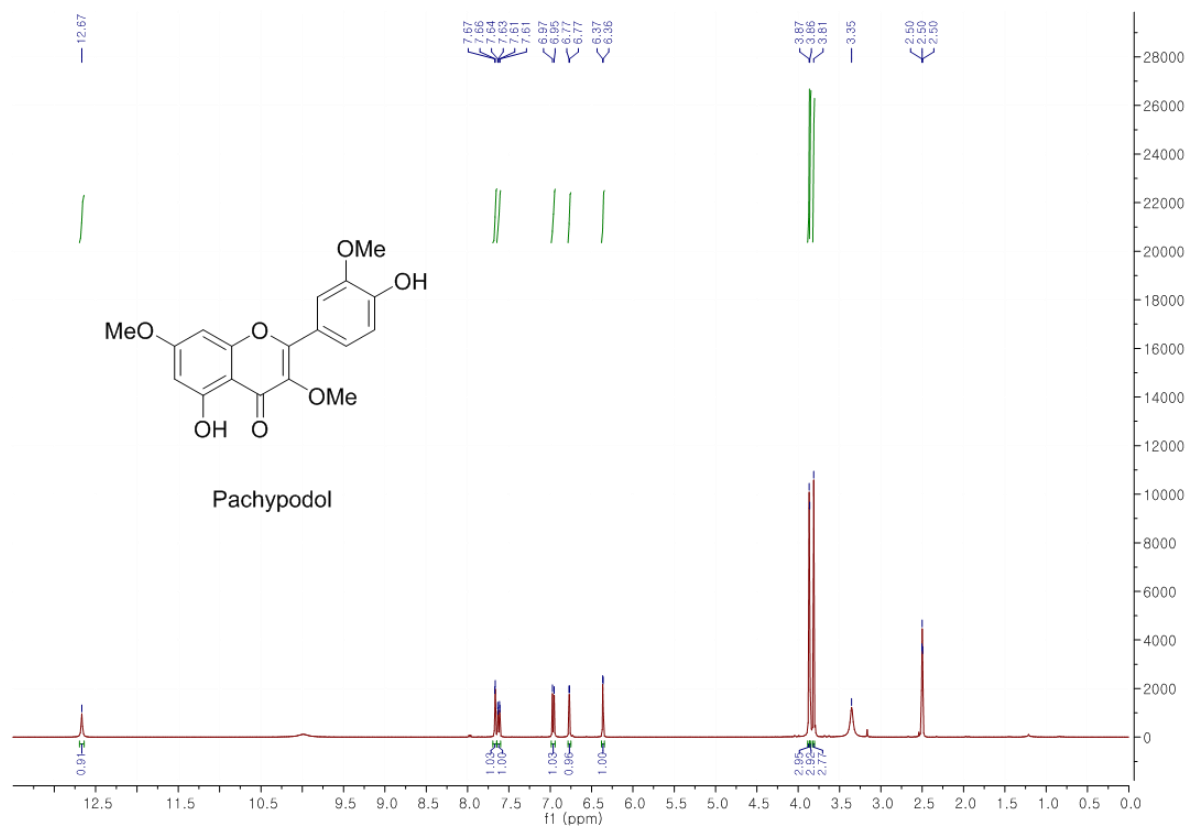

**Figure S3.** <sup>1</sup>H NMR spectrum of pachypodol. <sup>1</sup>H NMR (400 MHz, DMSO-*d*<sub>6</sub>) δ 12.67 (s, 1H, 5-OH), 7.67 (d, *J* = 1.9 Hz, 1H, H-2'), 7.62 (dd, *J* = 8.4, 1.9 Hz, 1H, H-6'), 6.96 (d, *J* = 8.4 Hz, 1H, H-5'), 6.77 (d, *J* = 2.1 Hz, 1H, H-6), 6.36 (d, *J* = 2.1 Hz, 1H, H-8), 3.87 (s, 3H, OMe), 3.86 (s, 3H, OMe), 3.81 (s, 3H, OMe).

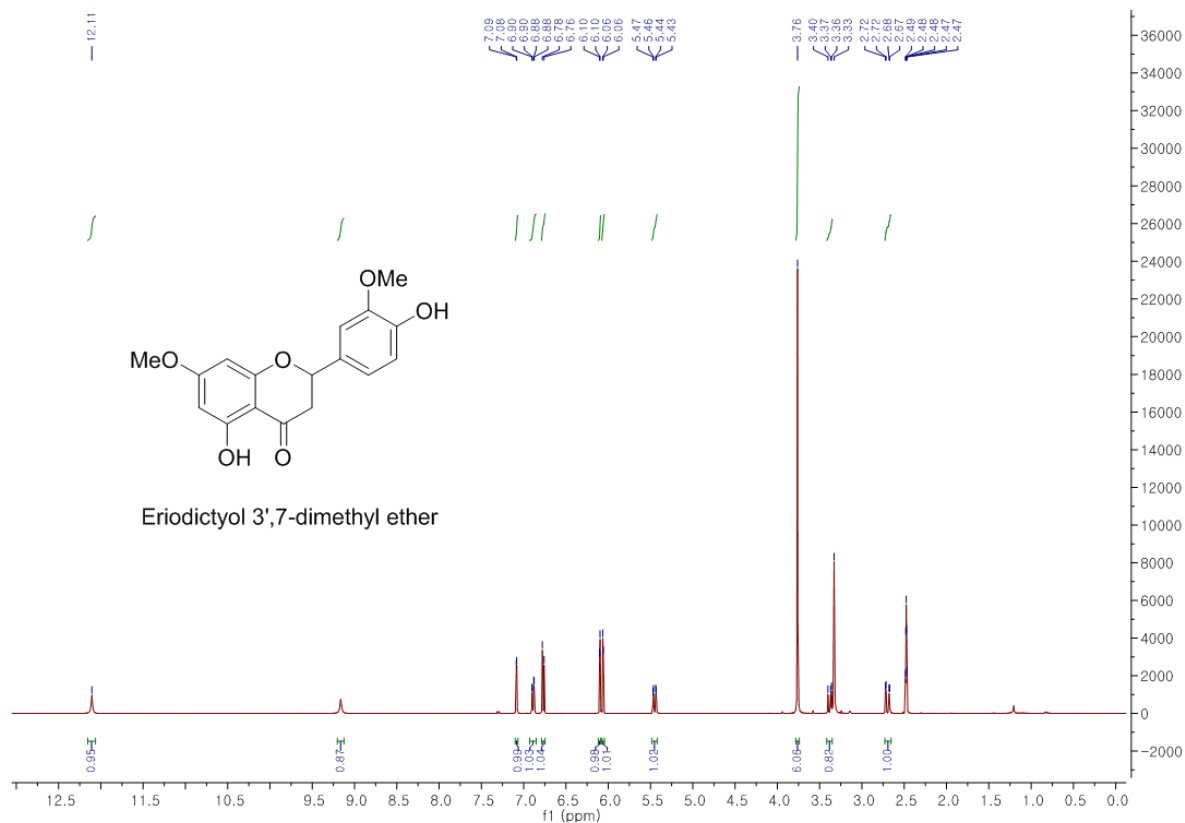

**Figure S4.**  $^1\text{H}$  NMR spectrum of eriodictyol 3',7-dimethyl ether.  $^1\text{H}$  NMR (400 MHz,  $\text{DMSO}-d_6$ )  $\delta$  12.13 (s, 1H, 5-OH), 9.19 (s, 1H, 4'-OH), 7.11 (d,  $J = 1.9$  Hz, 1H, H-2'), 6.91 (dd,  $J = 8.1, 1.9$  Hz, 1H, H-6'), 6.79 (d,  $J = 8.1$  Hz, 1H, H-5'), 6.12 (d,  $J = 2.3$  Hz, 1H, H-8), 6.08 (d,  $J = 2.3$  Hz, 1H, H-6), 5.47 (dd,  $J = 13.0, 2.8$  Hz, 1H, H-2), 3.79 (s, 6H, OMe), 3.44 – 3.37 (m, 1H, H-3<sub>trans</sub>), 2.72 (dd,  $J = 17.2, 3.0$  Hz, 1H, H-3<sub>cis</sub>).

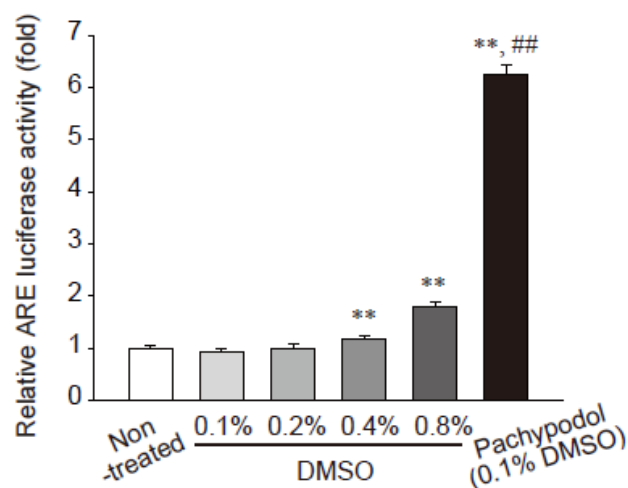

**Figure S5.** Effect of increasing concentrations of dimethyl sulfoxide (DMSO) on the Nrf2-ARE pathway in HepG2 cells. The ARE-luciferase activity was measured in the lysates of HepG2 cells stably transfected with pGL4.37 plasmid. Cells were non-treated or treated with either DMSO or 30  $\mu\text{M}$  pachypodol for 12 h. Data represent the mean  $\pm$  S.D. ( $n = 4$ ). \* $P < 0.05$ , \*\* $P < 0.01$  (compared with the value in non-treated cells); ## $P < 0.01$  (compared with the value in 0.1% DMSO-treated cells); ARE, antioxidant response element.
